# Supplementary material for: Iron metal induced deoxygenation of graphite oxide nanosheets-insights on the capacitive properties of binder-free electrodes
Source: Royal Society of Chemistry journal article supplement (doi:10.1039/c4ra15901b), 2015-01-01
Supplement: c4ra15901b1.pdf [file c4ra15901b1.pdf]

## Supplementary Information

### Iron metal induced deoxygenation of graphite oxide nanosheets- Insights on the capacitive properties of binder-free electrodes

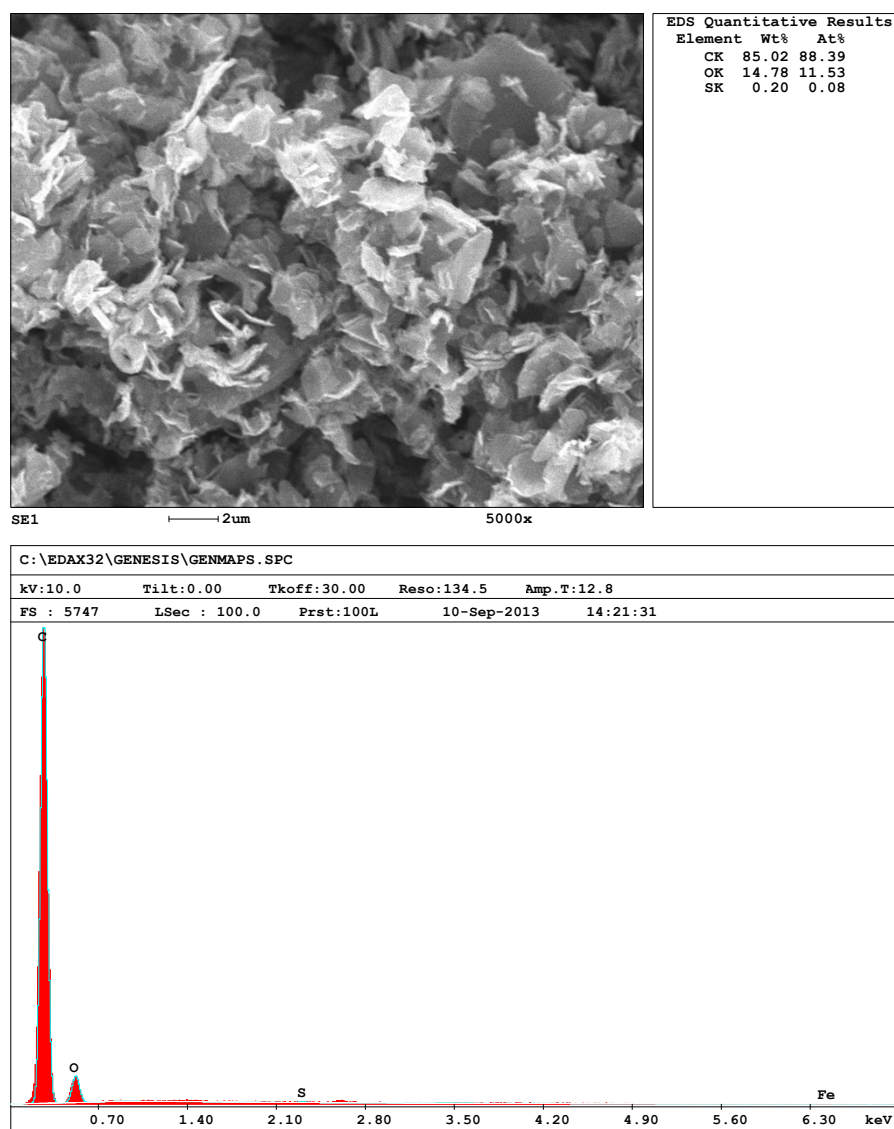

Figure S1. EDX spectrum of Fe-rGO.
